# Supplementary material for: Translation and cultural check of the WAI SR (Working Alliance Inventory Short Revised) in Hebrew using a Delphi consensus procedure
Source: Research Square preprint supplement (doi:10.21203/rs.3.rs-8539513/v1), 2026-02-18
Supplement: Supplementary file 1 [file 17e839377a6c30fadaf6e988.docx]

Annex 4: WAI SR Hebrew Version- Therapist version:

**שאלון ברית טיפולית מקוצר מטפל/ת**

תרגום ל- Working Alliance Inventory – Short Revised (WAI-SRT)- Therapist

**הוראות: לפניך רשימת היגדים לגבי חוויות שאנשים עשויים לחוות עם המטופל/ת שלהם. חלק מן הפריטים יכללו קו תחתון, ויתייחסו ישירות למטופל/ת שלך. בעת קריאתך, השלמ/י את שם המטופל/ת שלך במקום ה _______ בטקסט.**

**חשוב מאוד!!! בבקשה קח/י את הזמן ושקול/י כל שאלה בקפידה.**

**1. _______ ואני מסכימים לגבי הצעדים הנחוצים לשיפור מצבו/ה.**

| ➄ | ➃ | ➂ | ➁ | ➀ |
| --- | --- | --- | --- | --- |
| תמיד | לעתים קרובות מאוד | לעתים קרובות | לפעמים | לעתים רחוקות |

**2. אני דואג/ת בכנות לשלומו/ה של _______.**

| ➄ | ➃ | ➂ | ➁ | ➀ |
| --- | --- | --- | --- | --- |
| תמיד | לעתים קרובות מאוד | לעתים קרובות | לפעמים | לעתים רחוקות |

**3. אנחנו פועלים להשגת מטרות שהסכמנו עליהן יחדיו.**

| ➄ | ➃ | ➂ | ➁ | ➀ |
| --- | --- | --- | --- | --- |
| תמיד | לעתים קרובות מאוד | לעתים קרובות | לפעמים | לעתים רחוקות |

**4. _______ ואני מרגישים בטוחים שההתנהלות הנוכחית של הטיפול מועילה.**

| ➄ | ➃ | ➂ | ➁ | ➀ |
| --- | --- | --- | --- | --- |
| תמיד | לעתים קרובות מאוד | לעתים קרובות | לפעמים | לעתים רחוקות |

**5. אני מעריכ/ה את _______ כאדם.**

| ➄ | ➃ | ➂ | ➁ | ➀ |
| --- | --- | --- | --- | --- |
| תמיד | לעתים קרובות מאוד | לעתים קרובות | לפעמים | לעתים רחוקות |

**6. גיבשנו הבנה טובה של סוג השינויים שיהיו טובים בעבור______.**

| ➄ | ➃ | ➂ | ➁ | ➀ |
| --- | --- | --- | --- | --- |
| תמיד | לעתים קרובות מאוד | לעתים קרובות | לפעמים | לעתים רחוקות |

**7. _______ ואני מכבדים אחד/ת את השני/ה.**

| ➄ | ➃ | ➂ | ➁ | ➀ |
| --- | --- | --- | --- | --- |
| תמיד | לעתים קרובות מאוד | לעתים קרובות | לפעמים | לעתים רחוקות |

**8. יש ל____ ולי תפיסה משותפת לגבי המטרות שלו/ה.**

| ➄ | ➃ | ➂ | ➁ | ➀ |
| --- | --- | --- | --- | --- |
| תמיד | לעתים קרובות מאוד | לעתים קרובות | לפעמים | לעתים רחוקות |

**9. אני מכבד/ת את ______ גם כשהוא/היא עושה דברים שאינם לרוחי.**

| ➄ | ➃ | ➂ | ➁ | ➀ |
| --- | --- | --- | --- | --- |
| תמיד | לעתים קרובות מאוד | לעתים קרובות | לפעמים | לעתים רחוקות |

**10. אנחנו מסכימים לגבי מה חשוב ש______ יעבוד/תעבוד עליו.**

| ➄ | ➃ | ➂ | ➁ | ➀ |
| --- | --- | --- | --- | --- |
| תמיד | לעתים קרובות מאוד | לעתים קרובות | לפעמים | לעתים רחוקות |
