# Supplementary material for: Translation and cultural check of the WAI SR (Working Alliance Inventory Short Revised) in Hebrew using a Delphi consensus procedure
Source: Research Square preprint supplement (doi:10.21203/rs.3.rs-8539513/v1), 2026-02-18
Supplement: Supplementary file 2 [file 1947dfecf9c44dcf3ce4c31b.docx]

| **ORIGINAL VERSION** | **ISREALI VERSION** | **BACKWARD TRANSLATION**  **(english)** | **Comments – changes needed** |
| --- | --- | --- | --- |
| INSTRUCTIONS  Below is a list of statements and questions about experiences people might have with their therapy or Family  Physician. Some items refer directly to your Family Physician with an underlined space -- as you read the sentences, mentally insert the name of your Family Physician in place of in the text. Think  about your experience in therapy, and  decide which  category best describes your own experience. | **הוראות:**  **לפנייך רשימת היגדים ושאלות לגבי**  **חוויות שאנשים עשויים לחוות**  **במסגרת טיפול או**  **מול מטפל/ת שלהם. חלק מן הפריטים**  **יכללו קו תחתון, ומתייחסים ישירות למטפל/ת שלך. בעת קריאתך, השלימי את שם המטפל/ת שלך**  **במקום ה**  **בטקסט. חשבי על**  **החוויות שלך בטיפול, והחליטי איזו תשובה מתארת הכי טוב את**  **החוויה שלך.** | INSTRUCTIONS  Here is a list of statements regarding experiences people may experience during therapy or with their therapist. Some of the items include underscores, and relate to your therapist directly. While reading, replace the empty underscores in the text with the name of your therapist. Think of your own therapy experiences, and decide which  answer best  describes your experience. | *Same meaning* |
| IMPORTANT!!!  Please take your time to consider | **חשוב מאוד!!! בבקשה קח/י את** | Very important!!! Please take your time and consider | *Same meaning* |

| each question carefully. | **הזמן ושקול/י כל**  **שאלה בקפידה.** | each question with care. | *Carefully > with care: ok* |
| --- | --- | --- | --- |
| ANSWERS   - Seldom - Sometimes - Fairly Often - Often - Always | **–** לעתים רחוקות  **–** לפעמים **–** לעתים קרובות **-** לעתים קרובות מאוד  **-** תמיד | ANSWERS   - Seldom - Sometimes - Often - Very Often - Always | *Same meaning*  *Graduation is respected,change considered not important* |
| 1. As a result of these sessions I am clearer as to how I might be able to change. | **.1 כתוצאה**  **מהמפגשים הללו, יותר ברור לי כיצד**  **אני אוכל להשתנות.** | 1. As a result of these sessions, it is clearer to me how I could change. | *Same meaning* |
| 2. What I am doing in therapy gives me new ways of looking at my problem. | **.2 מה שאני עושה/עובר/ת בטיפול מאפשר לי להסתכל על הבעיה שלי**  **בדרכים חדשות.** | 2. What I do/go through in therapy allows me to look at my problem in new ways. | *Same meaning* |
| 3. I believe likes me. | **.3 אני**  **ש ה/מאמין**  **מחבב/ת אותי** | 3. I believe that  likes me. | *Same* |
| 4. and I collaborate on setting goals for my therapy. | **.4 ואני משתפים פעולה בקביעת מטרות**  **הטיפול שלי.** | 4. and I collaborate on setting the goals of my therapy. | *Same meaning* |
| 5. and I respect each other. | **.5 ואני מכבדים אחד/ת את**  **השני/ה.** | 5. and I respect each other. | *Same meaning* |
| 6. and I are working towards mutually agreed upon goals. | **.6 ואני פועלים להשגת מטרות שהסכמנו**  **עליהן יחדיו.** | 6. and I work together to achieve goals we've agreed upon together. | *Same meaning* |
| 7. I feel that appreciates me. | **.7 אני מרגיש/ה ש מעריכ/ה**  **אותי.** | 7. I feel that appreciates me. | *Same* |
| 8. and I agree on what is important for me to work on. | **.8 ואני מסכימים לגבי הדברים שחשוב**  **שאעבוד עליהם.** | 8. and I agree about the things it is important that I work on. | *Same meaning* |

| 9. I feel cares about me even when I do things that he/she does not approve of. | **.9 אני מרגיש/ה של אכפת ממני אפילו כשאני עושה דברים שאינם**  **לרוחו/ה.** | 9. I feel that cares about me even when I do things he/she doesn't agree with. | *Same meaning* |
| --- | --- | --- | --- |
| 10. I feel that the things I do in therapy will help me to accomplish the changes that I want. | **.10 אני מרגיש/ה שהדברים שאני עושה בטיפול יעזרו לי**  **להשיג את השינויים**  **שאני רוצה.** | 10. I feel that the things I do in therapy will help me achieve the changes I want. | *Same meaning* |
| 11. and I have established a good understanding of the kind of changes that would be good for me | **.11 ואני גיבשנו הבנה טובה של סוג השינויים**  **שיהיו טובים בעבורי.** | 11. and I formed a good understanding of the kind of things that will be good for me. | *Same meaning* |
| 12. I believe the way we are working with my problem is correct. | **.12 אני מאמינ/ה שהדרך שבה אנחנו מתמודדים עם הבעיה**  **שלי היא נכונה.** | 12. I believe that the way we cope with my problem is right. | *Same meaning* |

*Table 5* ***WAI SR Patient*** *- Cultural check - Comparison of the backward translation and the original version.*
