# Supplementary material for: Translation and cultural check of the WAI SR (Working Alliance Inventory Short Revised) in Hebrew using a Delphi consensus procedure
Source: Research Square preprint supplement (doi:10.21203/rs.3.rs-8539513/v1), 2026-02-18
Supplement: Supplementary file 3 [file 1f03d021d8ff644b616137be.docx]

**Supplementary Material**

1.1: Original English WAI - SR Patient Version:

**Working Alliance Inventory – Short Revised (WAI-SR)**

**Instructions**: Below is a list of statements and questions about experiences people might have with their therapy or therapist. Some items refer directly to your therapist with an underlined space -- as you read the sentences, mentally insert the name of your therapist in place of in the text. Think about your experience in therapy, and decide which category best describes your own experience.

IMPORTANT!!! Please take your time to consider each question carefully.

1. **As a result of these sessions I am clearer as to how I might be able to change.**

|  |  |  |  |  |
| --- | --- | --- | --- | --- |
| Seldom | Sometimes | Fairly Often | Very Often | Always |

1. **What I am doing in therapy gives me new ways of looking at my problem.**

|  |  |  |  |  |
| --- | --- | --- | --- | --- |
| Always | Very Often | Fairly Often | Sometimes | Seldom |

1. **I believe likes me.**

|  |  |  |  |  |
| --- | --- | --- | --- | --- |
| Seldom | Sometimes | Fairly Often | Very Often | Always |

1. **and I collaborate on setting goals for my therapy.**

|  |  |  |  |  |
| --- | --- | --- | --- | --- |
| Seldom | Sometimes | Fairly Often | Very Often | Always |

1. **and I respect each other.**

|  |  |  |  |  |
| --- | --- | --- | --- | --- |
| Always | Very Often | Fairly Often | Sometimes | Seldom |

1. **and I are working towards mutually agreed upon goals.**

|  |  |  |  |  |
| --- | --- | --- | --- | --- |
| Always | Very Often | Fairly Often | Sometimes | Seldom |

1. **I feel that appreciates me.**

|  |  |  |  |  |
| --- | --- | --- | --- | --- |
| Seldom | Sometimes | Fairly Often | Very Often | Always |

1. **and I agree on what is important for me to work on.**

|  |  |  |  |  |
| --- | --- | --- | --- | --- |
| Always | Very Often | Fairly Often | Sometimes | Seldom |

1. **I feel cares about me even when I do things that he/she does not approve of.**

|  |  |  |  |  |
| --- | --- | --- | --- | --- |
| Seldom | Sometimes | Fairly Often | Very Often | Always |

1. **I feel that the things I do in therapy will help me to accomplish the changes that I want.**

|  |  |  |  |  |
| --- | --- | --- | --- | --- |
| Always | Very Often | Fairly Often | Sometimes | Seldom |

1. **and I have established a good understanding of the kind of changes that would be good for me.**

|  |  |  |  |  |
| --- | --- | --- | --- | --- |
| Always | Very Often | Fairly Often | Sometimes | Seldom |

1. **I believe the way we are working with my problem is correct.**

|  |  |  |  |  |
| --- | --- | --- | --- | --- |
| Seldom | Sometimes | Fairly Often | Very Often | Always |

1.2: Original English WAI - SR Therapist Version

**Working Alliance Inventory – Short Revised - Therapist (WAI-SRT)**

**Instructions**: Below is a list of statements about experiences people might have with their client. Some items refer directly to your client with an underlined space -- as you read the sentences, mentally insert the name of your client in place of in the text.

IMPORTANT!!! Please take your time to consider each question carefully.

1. **and I agree about the steps to be taken to improve his/her situation.**

|  |  |  |  |  |
| --- | --- | --- | --- | --- |
| Seldom | Sometimes | Fairly Often | Very Often | Always |

1. **I am genuinely concerned for ’s welfare.**

|  |  |  |  |  |
| --- | --- | --- | --- | --- |
| Always | Very Often | Fairly Often | Sometimes | Seldom |

1. **We are working towards mutually agreed upon goals.**

|  |  |  |  |  |
| --- | --- | --- | --- | --- |
| Seldom | Sometimes | Fairly Often | Very Often | Always |

1. **and I both feel confident about the usefulness of our current activity in therapy.**

|  |  |  |  |  |
| --- | --- | --- | --- | --- |
| Seldom | Sometimes | Fairly Often | Very Often | Always |

1. **I appreciate as a person.**

|  |  |  |  |  |
| --- | --- | --- | --- | --- |
| Always | Very Often | Fairly Often | Sometimes | Seldom |

1. **We have established a good understanding of the kind of changes that would be good for ________.**

|  |  |  |  |  |
| --- | --- | --- | --- | --- |
| Always | Very Often | Fairly Often | Sometimes | Seldom |

1. **and I respect each other.**

|  |  |  |  |  |
| --- | --- | --- | --- | --- |
| Seldom | Sometimes | Fairly Often | Very Often | Always |

1. **and I have a common perception of his/her goals.**

|  |  |  |  |  |
| --- | --- | --- | --- | --- |
| Always | Very Often | Fairly Often | Sometimes | Seldom |

1. **I respect even when he/she does things that I do not approve of.**

|  |  |  |  |  |
| --- | --- | --- | --- | --- |
| Seldom | Sometimes | Fairly Often | Very Often | Always |

1. **We agree on what is important for to work on.**

|  |  |  |  |  |
| --- | --- | --- | --- | --- |
| Always | Very Often | Fairly Often | Sometimes | Seldom |

1.3: Original English WAI SR- Scoring Sheet

Scoring Key for the Hatcher-Gillaspy Short Form of the WAI

| H&G Item | Scale | Direction |
| --- | --- | --- |
| 1 | T | + |
| 2 | T | + |
| 3 | B | + |
| 4 | G | + |
| 5 | B | + |
| 6 | G | + |
| 7 | B | + |
| 8 | G | + |
| 9 | B | + |
| 10 | T | + |
| 11 | G | + |
| 12 | T | + |

Notes: G=Goal T=Task B=Bond

Direction= To derive a scale or total score, simply sum or take the mean of the items
