# Supplementary material for: Translation and cultural check of the WAI SR (Working Alliance Inventory Short Revised) in Hebrew using a Delphi consensus procedure
Source: Research Square preprint supplement (doi:10.21203/rs.3.rs-8539513/v1), 2026-02-18
Supplement: Supplementary file 4 [file 219e2250e10a6a5a1fa93693.docx]

| **ORIGINAL VERSION** | **ISREALI VERSION** | **BACKWARD**  **TRANSLATION (english)** | **Comments – changes needed** |
| --- | --- | --- | --- |
| INSTRUCTIONS | **הוראות** | Instructions | *Same* |
| Scoring key | **מפתח דירוג** | Scoring Key | *Same* |
| Patient scale mean | **ממוצע דירוג מטופל** | Average patient score | *Same meaning* |
| Family Physician scale mean | **ממוצע דירוג**  **מטפל (רופא**  **משפחה)** | Average therapist (Family Physician) score | *Same meaning* |
| Scale type | **סוג סולם דירוג** | Type of Scoring Scale | *Same meaning* |

| Goal | **מטרה** | Goal | *Same* |
| --- | --- | --- | --- |
| Task | **משימה** | Task | *Same* |
| Bond | **קשר** | Bond | *Same* |
| WAI-SR Item | **SR-WAI פריט** | SR-WAI item | *Same* |
| Score Patient version | **תוצאת שאלון מטופל** | Results of patient questionnaire | *Same meaning* |
| Score Family Physician version | **תוצאת שאלון**  **מטפל (רופא**  **משפחה)** | Results of therapist (Family Physician) questionnaire | *Same meaning* |
| To derive a scale or total score, simply sum and take the mean of the items. | **על מנת לחשב תוצאות יש**  **לסכום את התוצאות**  **ולחשב ממוצע** | To calculate results, sum the results and calculate the average. | *Same meaning, precisions were made, discussed with the other participant countries:*  *was Hebrew to changed על מנת be: לחשב תוצאה סופית יש לסכום את הפריטים .ולחשב ממוצע* |

*Table 7* ***WAI SR Scoring sheet*** *- Cultural check. Modifications as a matter of clarification in the last item.*
