# Supplementary material for: Translation and cultural check of the WAI SR (Working Alliance Inventory Short Revised) in Hebrew using a Delphi consensus procedure
Source: Research Square preprint supplement (doi:10.21203/rs.3.rs-8539513/v1), 2026-02-18
Supplement: Supplementary file 5 [file 2226a3f7e6e9e74a03d111c2.docx]

| **ORIGINAL VERSION** | **ISREALI VERSION** | **BACKWARD TRANSLATION**  **(english)** | | | **Comments – changes needed** |
| --- | --- | --- | --- | --- | --- |
| Instructions: below | **הוראות: לפניך** | Instructions: Here | | | *Same meaning* |
| is a list of | **רשימת היגדים לגבי** | is a list of | | |  |
| statements about | **חוויות שאנשים** | statements | | | *Client > patient:* |
| experiences | **עשויים לחוות עם** | regarding | | | *fine* |
| people might have | **המטופל/ת שלהם.** | experiences | | |  |
| with their client. | **חלק מן הפריטים** | people may | | |  |
| Some items refer | **יכללו קו תחתון,** | experience with | | |  |
| directly to your | **ויתייחסו ישירות** | their patient. Some | | |  |
| client with an | **למטופל/ת שלך. בעת** |  | of the items include |  |  |
| underlined space | **קריאתך, השלמ/י את** | underscores, and |  |
| as you read the | **שם המטופל/ת שלך** | relate to your |  |
| sentences, | **ה במקום** | patient directly. |  |
| mentally insert the | **בטקסט.** | While reading, |  |
| name of your client |  | replace the empty |  |

| in place of in the text. |  | underscores in the text with the name of your patient. |  |
| --- | --- | --- | --- |
| Important!!! Please | **חשוב מאוד!!!** | Very important!!! | *Same meaning* |
| take your time to | **בבקשה קח/י את** | Please take your |  |
| consider each | **הזמן ושקול/י כל** | time and consider | *Carefully > with* |
| question carefully. | **שאלה בקפידה.** | each question with | *care: ok* |
|  |  | care. |  |
| ANSWERS | **–** לעתים רחוקות | ANSWERS | *Same meaning* |
|  | **–** לפעמים |  |  |
| - Seldom | **–** לעתים קרובות | - Seldom | *Graduation is* |
| - Sometimes | **-** לעתים קרובות מאוד | - Sometimes | *respected, change* |
| - Fairly Often | **-** תמיד | - Often | *considered not* |
| - Often |  | - Very Often | *important* |
| - Always |  | - Always |  |
| 1. and I agree about the steps to be taken to improve his/her situation. | **.1 ואני מסכימים לגבי**  **הצעדים הנחוצים**  **לשיפור מצבו/ה.** | 1. and I agree about the required steps to improve his/her condition. | *Same meaning* |
| 2. I am genuinely | **.2 אני דואג/ת בכנות** | 2. I sincerely | *Same meaning* |
| concerned for | **לשלומו/ה של** | worry about |  |
| ’s welfare. | **.** | 's wellbeing. | *4-person* |
|  |  |  | *consensus* |
| 3. We are working | **.3 אנחנו פועלים** | 3. We work | *Same meaning* |
| towards mutually | **להשגת מטרות** | together to |  |
| agreed upon goals. | **שהסכמנו עליהן** | accomplish goals | *Changes* |
|  | **יחדיו.** | we've agreed on | *considered not* |
|  |  | together. | *important* |
| 4. and I both feel confident about the  usefulness of our current activity in therapy. | **.4 ואני מרגישים בטוחים שההתנהלות**  **הנוכחית של הטיפול**  **מועילה.** | 4. and I feel certain that the current progression of the treatment is helpful. | *Same meaning* |
| 5. I appreciate  as a person. | **.5 אני מעריכ/ה את**  **.כאדם** | 5. I appreciate  as a person. | *Same* |
| 6. We have | **.6 גיבשנו הבנה** | 6.We've formed a | *Same meaning* |
| established a good | **טובה של סוג** | good |  |

| understanding of the kind of changes that  would be good for  . | **השינויים שיהיו טובים**  **. בעבור** | understanding of the kind of changes that will be good for . |  |
| --- | --- | --- | --- |
| 7. and I respect each other. | **.7 ואני מכבדים אחד/ת את**  **השני/ה.** | .7 and I respect each other. | *Same* |
| 8. and I have a common perception of his/her goals. | **.8 יש ל ולי תפיסה משותפת**  **לגבי המטרות שלו/ה.** | 8. and I share a perception regarding his/her goals. | *Same meaning* |
| 9. I respect even when he/she does things that I do not approve of. | **.9 אני מכבד/ת את**  **גם**  **כשהוא/היא עושה**  **דברים שאינם לרוחי.** | 9. I respect even when they do things I do not agree with. | *Same meaning* |
| 10. We agree on what is important for to work on. | **.10 אנחנו מסכימים לגבי מה חשוב**  **ש**  **יעבוד/תעבוד עליו.** | 10.We agree about what is important for to work on. | *Same meaning* |

*Table 6* ***WAI SR Therapist*** *- Cultural check.*
