# Supplementary material for: Translation and cultural check of the WAI SR (Working Alliance Inventory Short Revised) in Hebrew using a Delphi consensus procedure
Source: Research Square preprint supplement (doi:10.21203/rs.3.rs-8539513/v1), 2026-02-18
Supplement: Supplementary file 5 [file 4777044a0f95e5f07c75a9eb.docx]

1. Characteristics of the leading group

| **FORMATION-ROLE** | **GENDER** | **AGE** | **ENGLISH LEVEL** | **NUMBER OF PUBLICATION** | | **PRACTICE TYPE** | **SETTING TYPE** | **TEACHING ACTIVITIES** | **RESEARCH ACTIVITIES** |
| --- | --- | --- | --- | --- | --- | --- | --- | --- | --- |
| **ENGLISH** | **OTHER LANGUAGES** |
| Group Coordinator GP Specialist n°1 | M | 60 | fluent | 22 | 1 | group | urban | yes | yes |
| GP Specialist n°2 | F | 47 | fluent | 8 | 1 | solo/group | rural | yes | yes |
| Linguist | M | 48 | fluent | 9 | 23 | (academic) |  | yes | yes |
| Psychologist | F | 33 | fluent |  |  | hospital rehabilitation | urban | yes | yes |

*Table 1 Characteristics of the leading group*
