# Supplementary material for: Translation and cultural check of the WAI SR (Working Alliance Inventory Short Revised) in Hebrew using a Delphi consensus procedure
Source: Research Square preprint supplement (doi:10.21203/rs.3.rs-8539513/v1), 2026-02-18
Supplement: Supplementary file 6 [file abf5322df65631d677222971.docx]

WAI SR Hebrew Version- Scoring Sheet:

**דף חישוב תוצאות - מטופל/ת**

תרגום ל- Scoring Key for the Hatcher-Gillaspy Short Form of the WAI

מפתח לחישוב תוצאות עבור טופסWAI-SR גירסת האטצ'ר-גילאספי

פריט האטצ'ר-גילאספי סולם כיוון פריט

1 T +

2 T +

3 B +

4 G +

5 B +

6 G +

7 B +

8 G +

9 B +

10 T +

11 G +

12 T +

הסבר:

- G=Goal מטרה
- T=Task משימה
- B=Bond קשר

הוראות: על מנת לחשב תוצאות יש לסכום את התוצאות או לחשב ממוצע.
