# Supplementary material for: Translation and cultural check of the WAI SR (Working Alliance Inventory Short Revised) in Hebrew using a Delphi consensus procedure
Source: Research Square preprint supplement (doi:10.21203/rs.3.rs-8539513/v1), 2026-02-18
Supplement: Supplementary file 8 [file ba97e69015b4a8aa88f1010c.docx]

WAI SR Hebrew Version- Patient - Male version:

תרגום ל- Working Alliance Inventory – Short Revised (WAI-SR)-Male Patient Hebrew version

**שאלון ברית טיפולית מקוצר מטופל**

**הוראות: לפניך רשימת היגדים ושאלות לגבי חוויות שאנשים עשויים לחוות במסגרת טיפול או מול מטפל/ת שלהם. חלק מן הפריטים יכללו קו תחתון, ומתייחסים ישירות למטפל/ת שלך. בעת קריאתך, השלמ/י את שם המטפל/ת שלך במקום ה _______ בטקסט. חשוב על החוויות שלך בטיפול, והחלט איזו תשובה מתארת הכי טוב את החוויה שלך.**

**חשוב מאוד!!! בבקשה קח את הזמן ושקול כל שאלה בקפידה.**

**1. כתוצאה מהמפגשים הללו, יותר ברור לי כיצד אני אוכל להשתנות.**

| ➄ | ➃ | ➂ | ➁ | ➀ |
| --- | --- | --- | --- | --- |
| תמיד | לעתים קרובות מאוד | לעתים קרובות | לפעמים | לעתים רחוקות |

**2. מה שאני עושה/עובר בטיפול מאפשר לי להסתכל על הבעיה שלי בדרכים חדשות.**

| ➄ | ➃ | ➂ | ➁ | ➀ |
| --- | --- | --- | --- | --- |
| תמיד | לעתים קרובות מאוד | לעתים קרובות | לפעמים | לעתים רחוקות |

**3. אני מאמין ש______ מחבב/ת אותי.**

| ➄ | ➃ | ➂ | ➁ | ➀ |
| --- | --- | --- | --- | --- |
| תמיד | לעתים קרובות מאוד | לעתים קרובות | לפעמים | לעתים רחוקות |

**4. ______ ואני משתפים פעולה בקביעת מטרות הטיפול שלי.**

| ➄ | ➃ | ➂ | ➁ | ➀ |
| --- | --- | --- | --- | --- |
| תמיד | לעתים קרובות מאוד | לעתים קרובות | לפעמים | לעתים רחוקות |

**5. ______ ואני מכבדים אחד את השני.**

| ➄ | ➃ | ➂ | ➁ | ➀ |
| --- | --- | --- | --- | --- |
| תמיד | לעתים קרובות מאוד | לעתים קרובות | לפעמים | לעתים רחוקות |

**6. ______ ואני פועלים להשגת מטרות שהסכמנו עליהן יחדיו.**

| ➄ | ➃ | ➂ | ➁ | ➀ |
| --- | --- | --- | --- | --- |
| תמיד | לעתים קרובות מאוד | לעתים קרובות | לפעמים | לעתים רחוקות |

**7. אני מרגיש ש______ מעריכ/ה אותי.**

| ➄ | ➃ | ➂ | ➁ | ➀ |
| --- | --- | --- | --- | --- |
| תמיד | לעתים קרובות מאוד | לעתים קרובות | לפעמים | לעתים רחוקות |

**8. ______ ואני מסכימים לגבי הדברים שחשוב שאעבוד עליהם.**

| ➄ | ➃ | ➂ | ➁ | ➀ |
| --- | --- | --- | --- | --- |
| תמיד | לעתים קרובות מאוד | לעתים קרובות | לפעמים | לעתים רחוקות |

**9. אני מרגיש של_______ אכפת ממני אפילו כשאני עושה דברים שאינם לרוחו/ה.**

| ➄ | ➃ | ➂ | ➁ | ➀ |
| --- | --- | --- | --- | --- |
| תמיד | לעתים קרובות מאוד | לעתים קרובות | לפעמים | לעתים רחוקות |

**10. אני מרגיש שהדברים שאני עושה בטיפול יעזרו לי להשיג את השינויים שאני רוצה.**

| ➄ | ➃ | ➂ | ➁ | ➀ |
| --- | --- | --- | --- | --- |
| תמיד | לעתים קרובות מאוד | לעתים קרובות | לפעמים | לעתים רחוקות |

**11. ______ואני גיבשנו הבנה טובה של סוג השינויים שיהיו טובים בעבורי.**

| ➄ | ➃ | ➂ | ➁ | ➀ |
| --- | --- | --- | --- | --- |
| תמיד | לעתים קרובות מאוד | לעתים קרובות | לפעמים | לעתים רחוקות |

**12. אני מאמין שהדרך שבה אנחנו מתמודדים עם הבעיה שלי היא נכונה.**

| ➄ | ➃ | ➂ | ➁ | ➀ |
| --- | --- | --- | --- | --- |
| תמיד | לעתים קרובות מאוד | לעתים קרובות | לפעמים | לעתים רחוקות |

2.2: WAI SR Hebrew Version- Patient (Female) version:

**שאלון ברית טיפולית מקוצר ( WAI-SR) – מטופלת**

תרגום ל- Working Alliance Inventory – Short Revised (WAI-SR)- Female Patient

**הוראות: לפניך רשימת היגדים ושאלות לגבי חוויות שאנשים עשויים לחוות במסגרת טיפול או מול מטפל/ת שלהם. חלק מן הפריטים יכללו קו תחתון, ומתייחסים ישירות למטפל/ת שלך. בעת קריאתך, השלם את שם המטפל/ת שלך במקום ה _______ בטקסט. חשבי על החוויות שלך בטיפול, והחלטי איזו תשובה מתארת הכי טוב את החוויה שלך.**

**חשוב מאוד!!! בבקשה קחי את הזמן ושקלי כל שאלה בקפידה.**

**1. כתוצאה מהמפגשים הללו, יותר ברור לי כיצד אני אוכל להשתנות.**

| ➄ | ➃ | ➂ | ➁ | ➀ |
| --- | --- | --- | --- | --- |
| תמיד | לעתים קרובות מאוד | לעתים קרובות | לפעמים | לעתים רחוקות |

**2. מה שאני עושה/עוברת בטיפול מאפשר לי להסתכל על הבעיה שלי בדרכים חדשות.**

| ➄ | ➃ | ➂ | ➁ | ➀ |
| --- | --- | --- | --- | --- |
| תמיד | לעתים קרובות מאוד | לעתים קרובות | לפעמים | לעתים רחוקות |

**3. אני מאמינה  ש______ מחבב/ת אותי.**

| ➄ | ➃ | ➂ | ➁ | ➀ |
| --- | --- | --- | --- | --- |
| תמיד | לעתים קרובות מאוד | לעתים קרובות | לפעמים | לעתים רחוקות |

**4. ______ ואני משתפים פעולה בקביעת מטרות הטיפול שלי.**

| ➄ | ➃ | ➂ | ➁ | ➀ |
| --- | --- | --- | --- | --- |
| תמיד | לעתים קרובות מאוד | לעתים קרובות | לפעמים | לעתים רחוקות |

**5. ______ ואני מכבדים אחד/ת את השניה.**

| ➄ | ➃ | ➂ | ➁ | ➀ |
| --- | --- | --- | --- | --- |
| תמיד | לעתים קרובות מאוד | לעתים קרובות | לפעמים | לעתים רחוקות |

**6. ______ ואני פועלים להשגת מטרות שהסכמנו עליהן יחדיו.**

| ➄ | ➃ | ➂ | ➁ | ➀ |
| --- | --- | --- | --- | --- |
| תמיד | לעתים קרובות מאוד | לעתים קרובות | לפעמים | לעתים רחוקות |

**7. אני מרגישה ש______ מעריכ/ה אותי.**

| ➄ | ➃ | ➂ | ➁ | ➀ |
| --- | --- | --- | --- | --- |
| תמיד | לעתים קרובות מאוד | לעתים קרובות | לפעמים | לעתים רחוקות |

**8. ______ ואני מסכימים לגבי הדברים שחשוב שאעבוד עליהם.**

| ➄ | ➃ | ➂ | ➁ | ➀ |
| --- | --- | --- | --- | --- |
| תמיד | לעתים קרובות מאוד | לעתים קרובות | לפעמים | לעתים רחוקות |

**9. אני מרגישה של_______ אכפת ממני אפילו כשאני עושה דברים שאינם לרוחו/ה.**

| ➄ | ➃ | ➂ | ➁ | ➀ |
| --- | --- | --- | --- | --- |
| תמיד | לעתים קרובות מאוד | לעתים קרובות | לפעמים | לעתים רחוקות |

**10. אני מרגישה שהדברים שאני עושה בטיפול יעזרו לי להשיג את השינויים שאני רוצה.**

| ➄ | ➃ | ➂ | ➁ | ➀ |
| --- | --- | --- | --- | --- |
| תמיד | לעתים קרובות מאוד | לעתים קרובות | לפעמים | לעתים רחוקות |

**11. ______ואני גיבשנו הבנה טובה של סוג השינויים שיהיו טובים בעבורי.**

| ➄ | ➃ | ➂ | ➁ | ➀ |
| --- | --- | --- | --- | --- |
| תמיד | לעתים קרובות מאוד | לעתים קרובות | לפעמים | לעתים רחוקות |

**12. אני מאמינה שהדרך שבה אנחנו מתמודדים עם הבעיה שלי היא נכונה.**

| ➄ | ➃ | ➂ | ➁ | ➀ |
| --- | --- | --- | --- | --- |
| תמיד | לעתים קרובות מאוד | לעתים קרובות | לפעמים | לעתים רחוקות |
