# Supplementary material for: Translation and cultural check of the WAI SR (Working Alliance Inventory Short Revised) in Hebrew using a Delphi consensus procedure
Source: Research Square preprint supplement (doi:10.21203/rs.3.rs-8539513/v1), 2026-02-18
Supplement: Supplementary file 9 [file dc8980e1f4e808d34b162421.docx]

| **EXPERT** | **AGE** | **GENDER** | **NUMBER OF YEARS OF PRACTICE** | **PRACTICE TYPE** | **SETTING TYPE** | **TEACHING** | **RESEARCH** | **NUMBER OF PUBLICATIONS** | **ENGLISH LEVEL** | **CONSENT** |
| --- | --- | --- | --- | --- | --- | --- | --- | --- | --- | --- |
| 1 | 63 | Female | 38 | Group | Urban | ✔ |  | 0 | Fluent | ✔ |
| 2 | 72 | Male | 37 | Group | Urban | ✔ | ✔ | 25 (20 in English) | Fluent | ✔ |
| 3 | 58 | Female | 32 | Solo | Urban | ✔ |  | 5 (2 in English) | Fluent | ✔ |
| 4 | 54 | Male | 25 | Solo | Urban | ✔ | ✔ | 165 (all in English) | Fluent | ✔ |
| 5 | 58 | Male | 34 | Solo | Urban | ✔ | ✔ | 102 (100 in English) | Fluent | ✔ |
| 6 | 43 | Female | 10 | Solo | Semi rural | ✔ |  | 1 (in English) | Fluent | ✔ |
| 7 | 46 | Male | 14 | Group | Urban | ✔ |  | 6 (2 in English) | Fluent | ✔ |
| 8 | 42 | Female | 13 | Other | Urban | ✔ |  | 0 | Fluent | ✔ |
| 9 | 66 | Male | 34 | Solo | Rural | ✔ |  | 13 (9 in English) | Fluent | ✔ |
| 10 | 52 | Female | 19 | Other | Urban |  |  | 32 (27 in English) | Fluent | ✔ |
| 11 | 61 | Male | 37 | Group | Urban | ✔ |  | 0 | Fluent | ✔ |
| 12 | 57 | Female | 20 | Group | Rural | ✔ |  | 7 (2 in English) | Fluent | ✔ |
| 13 | 49 | Male | 15 | Solo | Rural | ✔ | ✔ | 7 (6 in English) | Fluent | ✔ |
| **Average : 55** | | **Women 46 %**  **Men 54 %** | **Average : 25** | **Solo 46%**  **Group 38%**  **Other 15%** | **Rural 23%**  **Semi rural 8%**  **Urban 69 %** | **92%** | **31%** |  | **100%** | **100%** |

*Table 2 Characteristics of the experts’ panel*
