# Supplementary material for: Translation and cultural check of the WAI SR (Working Alliance Inventory Short Revised) in Hebrew using a Delphi consensus procedure
Source: Research Square preprint supplement (doi:10.21203/rs.3.rs-8539513/v1), 2026-02-18
Supplement: Supplementary file 10 [file fa24cbb0866f23fbcb300334.docx]

| CODE | INSTR | IMPORT | ANSWER | Q1 | Q2 | Q3 | Q4 | Q5 | Q6 | Q7 | Q8 | Q9 | Q10 |
| --- | --- | --- | --- | --- | --- | --- | --- | --- | --- | --- | --- | --- | --- |
| 1 | 8 |  | 9 | 9 | 9 | 9 | 9 | 9 | 9 | 9 | 9 | 9 | 9 |
| 2 | 7 |  | 8 | 8 | 9 | 7 | 7 | 9 | 6 | 9 | 6 | 7 | 7 |
| 3 | 9 |  | 9 | 9 | 9 | 9 | 9 | 9 | 9 | 9 | 9 | 9 | 9 |
| 4 | 6 |  | 9 | 9 | 9 | 9 | 6 | 9 | 7 | 9 | 9 | 9 | 7 |
| 5 | 9 |  | 9 | 9 | 9 | 9 | 9 | 7 | 9 | 9 | 9 | 9 | 9 |
| 6 | 9 |  | 9 | 9 | 9 | 9 | 9 | 9 | 9 | 9 | 9 | 9 | 9 |
| 7 | 5 |  | 8 | 8 | 5 | 5 | 7 | 8 | 7 | 6 | 6 | 8 | 5 |
| 8 | 9 |  | 9 | 9 | 9 | 9 | 8 | 9 | 9 | 9 | 9 | 9 | 9 |
| 9 | 9 |  | 9 | 9 | 9 | 9 | 9 | 9 | 9 | 9 | 9 | 9 | 9 |
| 10 | 9 |  | 9 | 9 | 9 | 9 | 7 | 9 | 9 | 9 | 6 | 9 | 9 |
| 11 | 8 |  | 6 | 8 | 8 | 8 | 8 | 8 | 8 | 8 | 8 | 8 | 8 |
| 12 | 7 |  | 9 | 9 | 9 | 8 | 6 | 9 | 9 | 5 | 9 | 9 | 9 |
| 13 | 9 |  | 9 | 9 | 9 | 9 | 9 | 9 | 9 | 9 | 9 | 9 | 9 |

13

| < 7 | 2 | 0 | 1 | 0 | 1 | 1 | 2 | 0 | 1 | 2 | 3 | 0 | 1 |
| --- | --- | --- | --- | --- | --- | --- | --- | --- | --- | --- | --- | --- | --- |
| >= 7 | 11 | 13 | 12 | 13 | 12 | 12 | 11 | 13 | 12 | 11 | 10 | 13 | 12 |
| CHECK | 13 | 13 | 13 | 13 | 13 | 13 | 13 | 13 | 13 | 13 | 13 | 13 | 13 |
| TOTAL | 84,62% | 100,00% | 92,31% | 100,00% | 92,31% | 92,31% | 84,62% | 100,00% | 92,31% | 84,62% | 76,92% | 100,00% | 92,31% |

*Table 4 Delphi round N°1, evaluation of the WAI SR Therapist*
